# Supplementary material
Source: PubMed Central journal article supplement (PMC4333000)

**A.**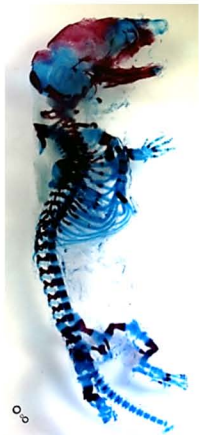**B.****Mut Tg**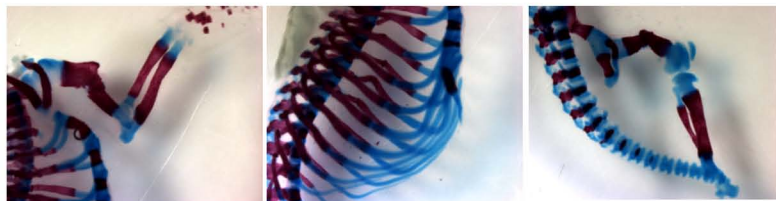**NT**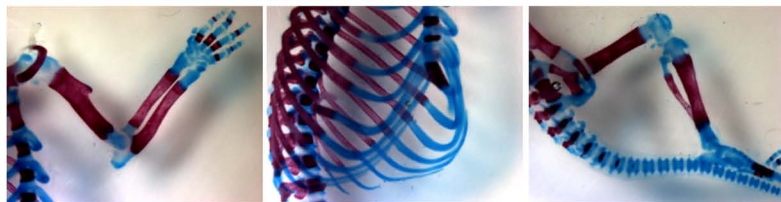**C.****Mut Tg**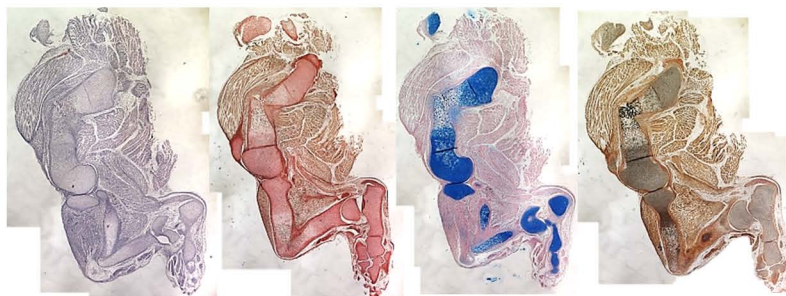**NT**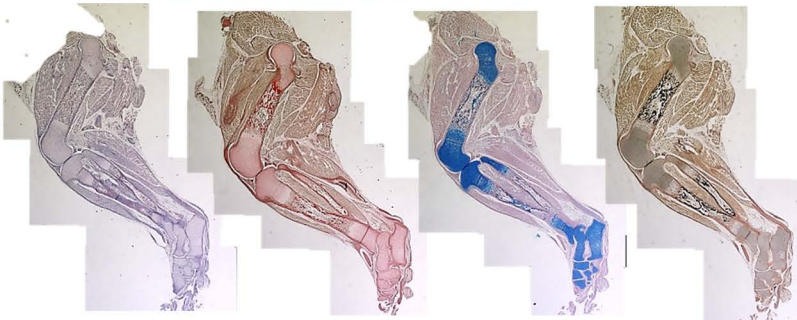**D.**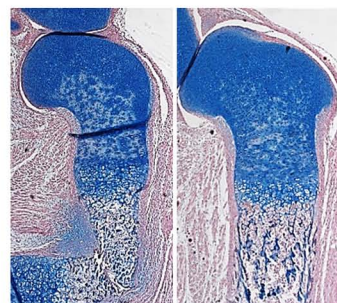**Mut Tg****NT**

## A. Femurs

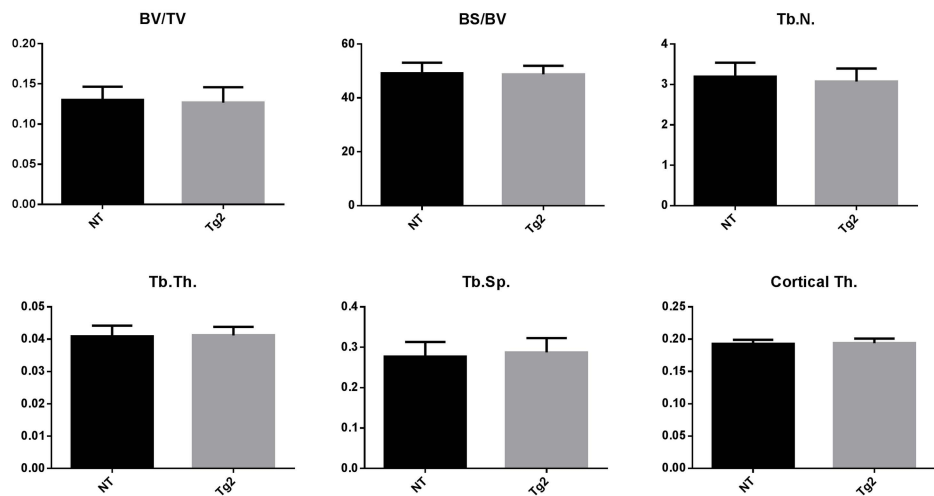

## B. Spines

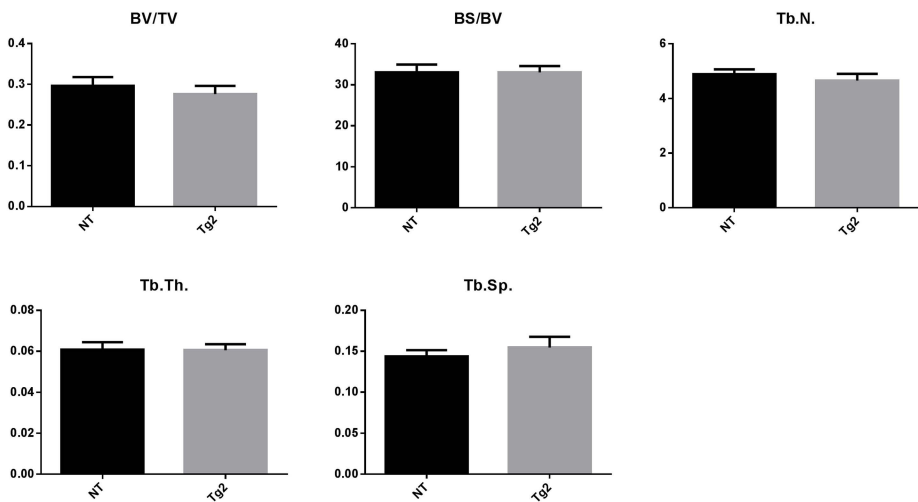

## A. Femur

BV/TV

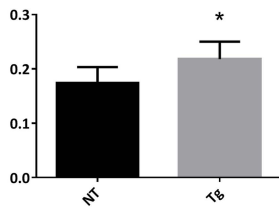

BS/BV

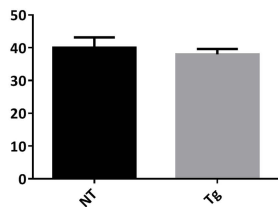

Tb.N.

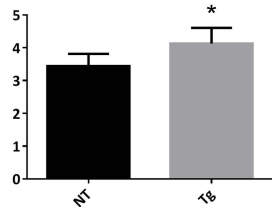

Tb.Th.

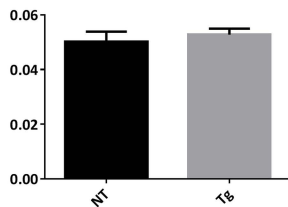

Tb.Sp.

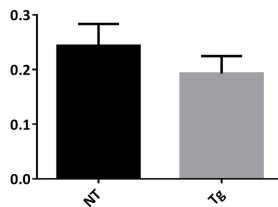

Cortical Th.

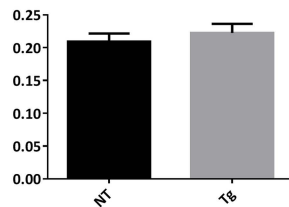

## B. Spine

BV/TV

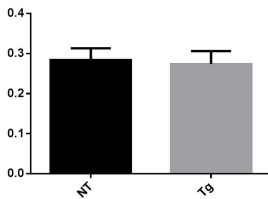

BS/BV

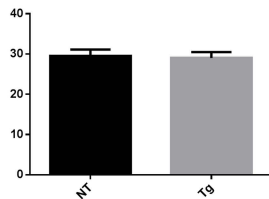

Tb.N.

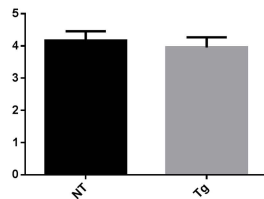

Tb.Th.

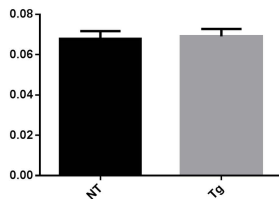

Tb.Sp.

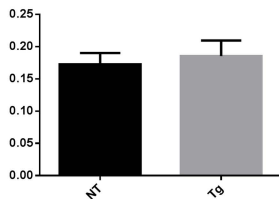

Supplement: NIHMS637743-supplement-Supp_FigureS1-S3.pdf [file NIHMS637743-supplement-Supp_FigureS1-S3.pdf]
